# Supplementary material for: Toward low-sensitive and high-energetic co-crystal II: structural, electronic and energetic features of CL-20 polymorphs and the observed CL-20-based energetic–energetic co-crystals
Source: Royal Society of Chemistry journal article supplement (doi:10.1039/c4ce00584h), 2014-01-01
Supplement: c4ce00584h1.pdf [file c4ce00584h1.pdf]

## **Toward Low-sensitive and High-energetic Cocystal II: Structural, Electronic and Energetic Features of CL-20 Polymorphs and the Observed CL-20-based Energetic-energetic Cocystals**

Chaoyang Zhang,<sup>†\*</sup> Xianggui Xue,<sup>†</sup> Yaofeng Cao,<sup>†‡</sup> Junhong Zhou,<sup>s</sup> Anbang Zhang,<sup>†</sup> Hongzhen, Li,<sup>†</sup> Yang Zhou,<sup>†</sup> Ruijuan Xu,<sup>†</sup> and Tao Gao<sup>‡</sup>

<sup>†</sup>*Institute of Chemical Materials, China Academy of Engineering Physics (CAEP), P. O. Box 919-327, Mianyang, Sichuan 621900, China.*

<sup>‡</sup>*Institute of Atomic and Molecular Physics, Sichuan University, Chengdu, Sichuan 610065, China.*

<sup>s</sup>*Shanghai Institute of Organic Chemistry, Chinese Academy of Science, Shanghai 200032, China.*

### **Electronic supplementary information (ESI)**

#### **Table of Contents**

**S1. Crystal packing of three CL-20-based EECCs.**

**S2. Relative energy of three formed conformers of CL-20 in gaseous state and solutions.**

**S3. Dihedrals in  $\beta$ -CL-20, CL-20/TNT, CL-20/HMX and CL-20/BTF.**

**S4. Crystal packing of TATB.**

### S1. Crystal packing of three CL-20-based EECCs.

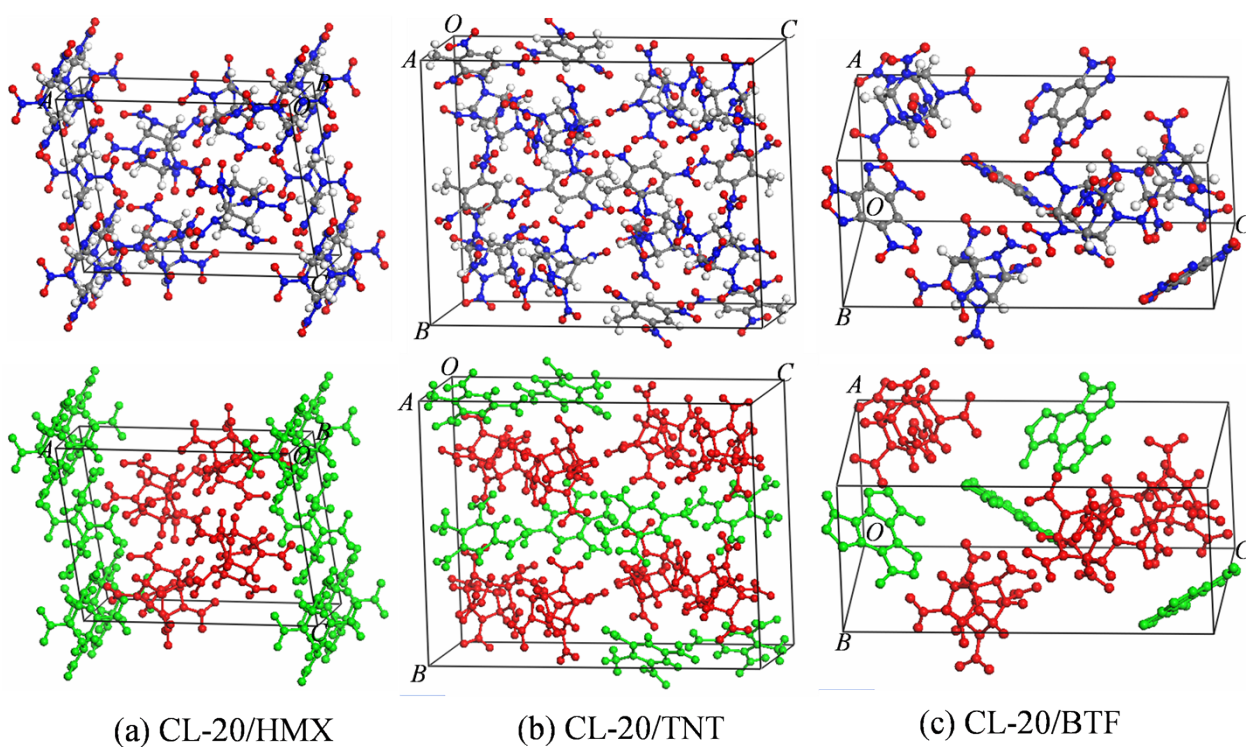

**Figure S1.** Crystal packing of three CL-20-based EECCs. In the bottom arrow, two kinds of energetic molecules are distinguished by different colors.

## S2. Relative energy of three formed conformers of CL-20 in gaseous state and solutions.

The geometries of  $\alpha$  ( $\gamma$ ),  $\beta$ , and  $\epsilon$ -formed CL-20 conformations in gaseous state and solvents and all solvent molecules were fully optimized at the B3LYP/6-311++G\*\* level of density functional theory.

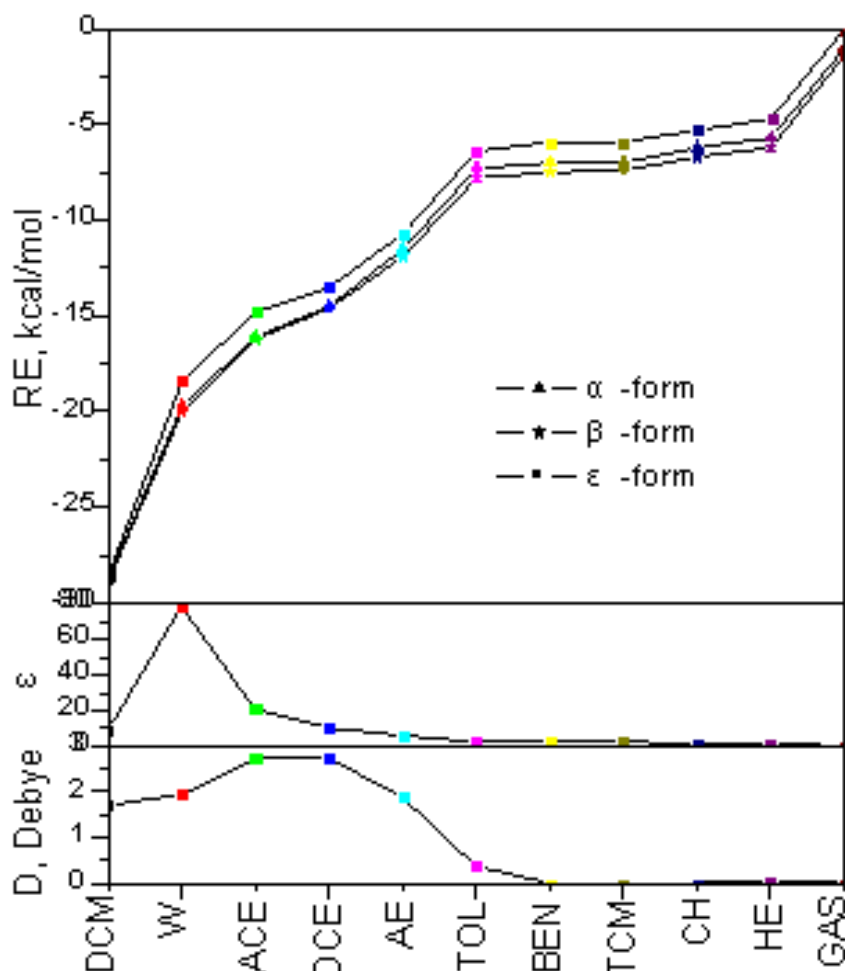

Figure s2. Relative energies of three interested CL-20 conformations in the ten solvents to the  $\epsilon$ -formed one in gaseous state, dielectric constants ( $\epsilon$ ) and dipole moments (D) of the solvents. Ten solvents with a large range of dielectric constants ( $\epsilon$ ) within 1.92-78.39, heptane (HE), cyclohexane (CH), carbontetrachloride (TCM), benzene (BEN), toluene (TOL), acetic ether (AE), dichloromethane (DCM), dichloroethane (DCE), acetone (ACE) and water (W).

### S3. Dihedrals in $\beta$ -CL-20, CL-20/TNT, CL-20/HMX and CL-20/BTF.

**Table s1.** Dihedrals in  $\beta$ -CL-20, CL-20/TNT, CL-20/HMX and CL-20/BTF.

|                 | $\beta$ -CL-20 | CL-20/TNT | CL-20/HMX                      | CL-20/BTF |
|-----------------|----------------|-----------|--------------------------------|-----------|
| C27-N17-N18-O5  | -23.7          | -38.9     | -15.3 ( $\gamma$ )/( $\beta$ ) | 19.1      |
| C30-N13-N14-O1  | -26.3          | -15.7     | 20.1                           | 21.3      |
| C27-N19-N20-O7  | -15.1          | -17.3     | 22.9                           | 17.7      |
| C30-N23-N24-O12 | -28.1          | -33.0     | 24.7                           | 16.8      |

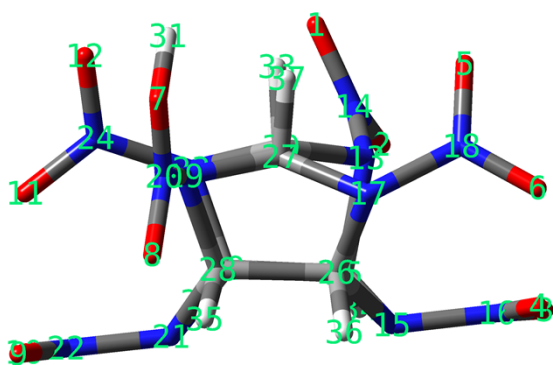

**Figure s3.** Atomic numbering of  $\beta$ -CL-20.

#### S4. Crystal packing of TATB.

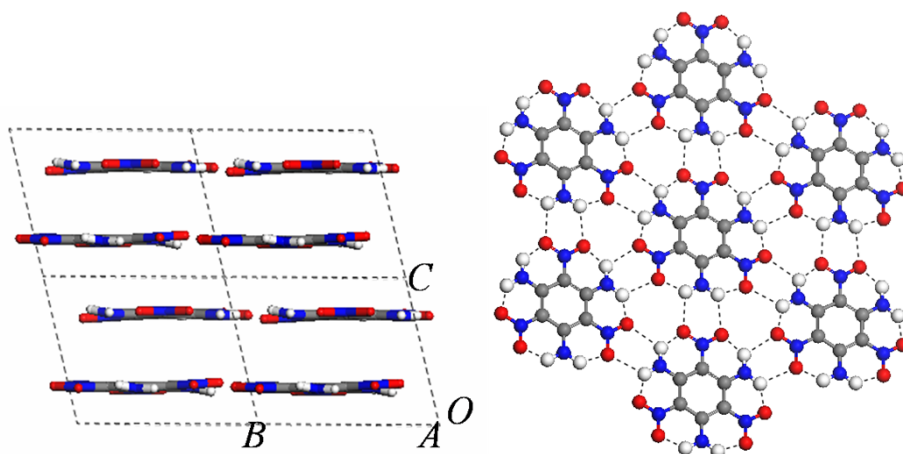

**Figure s4.** Layered crystal packing of TATB (left) and hydrogen bonds in a layer represented by dash (right).
